# Supplementary material for: Psychometric Properties of NASA-TLX and Index of Cognitive Activity as Measures of Cognitive Workload in Older Adults
Source: PubMed Central journal article supplement (PMC7766152; doi:10.3390/brainsci10120994), 2020-12-16
Supplement: brainsci-10-00994-s001.pdf [file brainsci-10-00994-s001.pdf]

## Supplementary File

**Table S1.** IntraClass Correlation Coefficients (ICC) of NASA-TLX and ICA of the Three Subgroups.

|                    | <b>A<math>\beta</math>- (<i>n</i> = 16)</b> | <b>A<math>\beta</math>+ (<i>n</i> = 16)</b> | <b>MCI/AD (<i>n</i> = 6)</b>     |
|--------------------|---------------------------------------------|---------------------------------------------|----------------------------------|
| Variable           | ICC, (95% CI)                               | ICC, (95% CI)                               | ICC, (95% CI)                    |
| 0-back, NASA-TLX   | 0.70 (0.06 – 0.90) <sup>c</sup>             | 0.95 (0.83 – 0.98) <sup>a</sup>             | 0.87 (–0.18 – 0.99) <sup>b</sup> |
| 0-back, mean ICA L | 0.79 (0.33 – 0.93) <sup>b</sup>             | 0.44 (–0.68 – 0.81)                         | 0.06 (–7.94 – 0.90)              |
| 0-back, mean ICA R | 0.80 (0.34 – 0.94) <sup>b</sup>             | 0.55 (–0.35 – 0.85)                         | 0.45 (–4.24 – 0.94)              |
| 1-back, NASA-TLX   | 0.50 (–0.057 – 0.84)                        | 0.83 (0.47 – 0.95) <sup>b</sup>             | 0.88 (0.13 – 0.98) <sup>b</sup>  |
| 1-back, mean ICA L | 0.64 (–0.08 – 0.88) <sup>c</sup>            | 0.88 (0.62 – 0.95) <sup>a</sup>             | 0.74 (–1.43 – 0.97)              |
| 1-back, mean ICA R | 0.63 (–0.15 – 0.88) <sup>c</sup>            | 0.42 (–0.65 – 0.80)                         | 0.91 (0.14 – 0.99) <sup>b</sup>  |
| 2-back, NASA-TLX   | 0.59 (–0.39 – 0.87)                         | 0.73 (0.20 – 0.91) <sup>b</sup>             | 0.87 (0.03 – 0.98) <sup>c</sup>  |
| 2-back, mean ICA L | 0.63 (–0.10 – 0.88) <sup>b</sup>            | 0.77 (0.32 – 0.92) <sup>b</sup>             | –2.44 (–32.04 – 0.64)            |
| 2-back, mean ICA R | 0.60 (–0.41 – 0.88)                         | 0.66 (–0.07 – 0.89) <sup>a</sup>            | 0.67 (–2.19 – 0.97)              |

A $\beta$ –, cognitively normal, non-elevated; A $\beta$ +, cognitively normal, elevated; CI, confidence interval; ICA, Index of Cognitive Activity; MCI/AD, mild cognitive impairment or Alzheimer’s disease; NASA-TLX, NASA-Task Load Index. <sup>a</sup>*p* < 0.0001, <sup>b</sup>*p* < 0.01, <sup>c</sup>*p* < 0.05.
